## Allele specific expression analysis identifies regulatory variation associated with stress-related genes in the Mexican highland maize landrace Palomero Toluqueño

M. Rocío Aguilar-Rangel<sup>1,2</sup> <sup>ψ</sup>, Ricardo A. Chávez Montes<sup>1,3</sup> <sup>ψ</sup>, Eric Gonzalez-Segovia<sup>1</sup>, Jeffrey Ross-Ibarra<sup>4</sup>, June K. Simpson<sup>2</sup>, Ruairidh J. H. Sawers<sup>1</sup>

<sup>1</sup>Unidad de Genómica Avanzada (LANGEBIO), Centro de Investigación y de Estudios Avanzados del Instituto Politécnico Nacional, Km. 9.6 Libramiento Norte, Carretera Irapuato-León, CP 36821 Irapuato, Guanajuato, México.

<sup>2</sup>Departamento de Ingeniería Genética, Centro de Investigación y de Estudios Avanzados del Instituto Politécnico Nacional (CINVESTAV-IPN), Km. 9.6 Libramiento Norte, Carretera Irapuato-León, CP 36821 Irapuato, Guanajuato, México.

<sup>3</sup>ABACUS: Laboratorio de Matemáticas Aplicadas y Cómputo de Alto Rendimiento del Departamento de Matemáticas, Centro de Investigación y de Estudios Avanzados del Instituto Politécnico Nacional (CINVESTAV-IPN), Carretera México-Toluca Km. 38.5, Ocoyoacac, Estado de México, México.

<sup>4</sup>Department of Plant Sciences, Center for Population Biology, and Genome Center, University of California, Davis, CA, 95616, USA.

<sup>ψ</sup> These authors contributed equally to this work

Corresponding Author:

Ruairidh Sawers<sup>1</sup>

e-mail address: [rusawers@cinvestav.mx](mailto:rusawers@cinvestav.mx)

## 1 **ABSTRACT**

2 **Background.** Gene regulatory variation has been proposed to play an important role in the adaptation  
3 of plants to environmental stress. In the central highlands of Mexico, farmer selection has generated a  
4 unique group of maize landraces adapted the challenges of the highland niche. In this study, gene  
5 expression in Mexican highland maize and a reference maize breeding line were compared to identify  
6 evidence of regulatory variation in stress-related genes. It was hypothesised that local adaptation in  
7 Mexican highland maize would be associated with a transcriptional signature observable even under  
8 benign conditions.

9 **Methods.** Allele specific expression analysis was performed using the seedling-leaf transcriptome of an  
10 F<sub>1</sub> individual generated from the cross between the highland adapted Mexican landrace Palomero  
11 Toluqueño and the reference line B73, grown under benign conditions. Results were compared with a  
12 published dataset describing the transcriptional response of B73 seedlings to cold, heat, salt and UV  
13 treatments.

14 **Results.** A total of 2386 genes were identified to show allele specific expression. Of these, 277 showed  
15 an expression difference between Palomero Toluqueño and B73 alleles that mirrored the response of  
16 B73 cold, heat, salt and/or UV treatments, and, as such, were considered to display a constitutive stress  
17 response. Constitutive stress response candidates included genes associated with plant hormone  
18 signaling and a number of transcription factors. Construction of a gene co-expression network revealed  
19 further signaling and stress-related genes to be among the potential targets of the transcription factors  
20 candidates.

21 **Discussion.** Constitutive activation of responses may represent the best strategy when stresses are  
22 severe but predictable. Expression differences observed here between PT and B73 alleles indicate the  
23 presence of *cis*-acting regulatory variation linked to stress-related genes in PT. Considered alongside  
24 gene annotation and population data, allele specific expression analysis of plants grown under benign

25 conditions provides an attractive strategy to identify functional variation potentially linked to local  
26 adaptation.

27

28

## 29 INTRODUCTION

30 Extensive study across different plant species has identified a range of transcriptional responses to  
31 abiotic stresses. Although basic responses are typically conserved, variation in the regulation of stress-  
32 responsive genes has been observed among individuals and varieties, potentially playing an important  
33 role in adaptation to stressful environments (Hannah et al., 2006); (Swanson-Wagner et al., 2012);  
34 (Rengel et al., 2012); (Lasky et al., 2014). From an agronomic perspective, biotechnological approaches  
35 to enhance crop stress tolerance to abiotic stress often aim to manipulate gene expression rather than  
36 engineer protein sequences (*e.g.* (Kamthan et al., 2016)). Similarly, efforts to identify suitable material  
37 for breeding towards similar goals have drawn on natural *cis*-acting regulatory variation acting on  
38 stress-responsive gene expression (*e.g.* (Mao et al., 2015)). As such efforts are intensified in the face of  
39 mounting concern regarding the impact of climate change on crop productivity, there is ever greater  
40 interest in the genetic basis of variation in stress-responses (Des Marais, Hernandez & Juenger, 2013).

41 Crop landrace varieties represent an invaluable genetic resource. Collectively, the range of  
42 environments exploited by landraces typically exceeds that of improved varieties, and many landraces  
43 are adapted to conditions that would be considered stressful in conventional agriculture (Ruiz Corral et  
44 al., 2008) (Romero Navarro et al., 2017). Nonetheless, although landraces represent a compelling  
45 source for enhancing abiotic stress tolerance in breeding programs, the task of identifying useful  
46 genetic variants and transferring them to breeding material is far from trivial (Sood et al., 2014). In  
47 addition to the complication of working with often heterogenous landrace germplasm, reproducing  
48 stress conditions for evaluation is costly and difficult. Furthermore, stress is not well reflected by a  
49 single experimental treatment, but rather represents a continuous environmental range defined by  
50 interacting variables acting over the lifetime of the plant. Large-scale phenomics efforts are an attempt  
51 to implement the factorial designs required to capture such complexity (Houle, Govindaraju & Omholt,  
52 2010); (Furbank & Tester, 2011), but they require a substantial investment in infrastructure that may

53 not be feasible in many research contexts. One possible alternative is to leave aside the difficulties of  
54 managing the environment and to look for signatures of an enhanced stress response that are hardwired  
55 in locally adapted material and evident under benign conditions.

56         Stress responses are considered to be an adaptation to an unpredictable, changing environment.  
57 When conditions are adverse, but predictable, however, theory suggests that the plastic response may  
58 be replaced by constitutive activation, a process referred to as canalization (Waddington, 1942);  
59 (Levins); (von Heckel, Stephan & Hutter, 2016). One potential advantage of canalization is to avoid the  
60 delay between stimulus and response inherent in plasticity. In cultivated systems, non-adapted varieties  
61 can benefit from mild priming stress treatments that activate protective mechanisms and prepare the  
62 plants for future more severe environmental challenges (Hilker et al., 2016). In practice, however, the  
63 first exposure to a stress may be severe, placing the unprepared organism at risk. Under strong yet  
64 predictable environmental stress, constitutive activation may represent the best strategy. On this basis,  
65 the transcriptome may reflect local adaptation even under benign conditions, presenting an opportunity  
66 to identify genetic variation related to enhanced stress tolerance without the complication of managing  
67 the stress environment.

68         Comparative transcriptome analysis of stress tolerant and non-tolerant varieties provides a  
69 powerful approach to identify the molecular mechanisms underlying tolerance variation (*e.g.* (Hayano-  
70 Kanashiro et al., 2009); (von Heckel, Stephan & Hutter, 2016). The number of differentially  
71 accumulating transcripts, however, may be large, and the data reflect both *cis*-acting and *trans*-acting  
72 regulatory variation. Critically, *per se* comparison of varieties has little power to characterize the  
73 genetic architecture of stress tolerance or to identify causative genetic variation. In addition, when  
74 material is diverse, phenological differences can make it difficult to devise an appropriate sampling  
75 strategy. With the development of sequencing based methods to study the transcriptome, it is possible  
76 to make use of natural sequence variation to quantify allele specific expression (ASE) in F<sub>1</sub> hybrid

77 individuals generated from the cross of two different lines of interest (Springer & Stupar, 2007b);  
78 (Springer & Stupar, 2007a); (Zhang & Borevitz, 2009); (Lemmon et al., 2014). Characterization of  
79 ASE in F<sub>1</sub> material avoids the problems of comparing parents that may be very different in growth and  
80 development by evaluating both alleles within the same cellular environment, directly revealing *cis*-  
81 acting genetic variation for transcript accumulation (Springer & Stupar, 2007b); (Lemmon et al., 2014);  
82 (Waters et al., 2017).

83         In this study, a transcriptome dataset was examined for evidence of *cis*-regulatory variation  
84 linked to stress-associated genes in Palomero Toluqueño (PT), a maize landrace adapted to the  
85 highlands of Central Mexico (Prasanna, 2012); (Perales & Golicher, 2014). The Mexican highland  
86 environment exposes maize plants to a number of abiotic stresses: bringing plants to maturity under  
87 low-temperatures necessitates planting early in the year, exposing seedlings to late frosts and water  
88 deficit before onset of the annual rains; throughout the growing season, low-temperature, high-levels of  
89 UV radiation and hail storms pose further challenges (Eagles & Lothrop, 1994); (Lafitte & Edmeades,  
90 1997); (Jiang et al., 1999); (Mercer, Martínez-Vásquez & Perales, 2008); (Ruiz Corral et al., 2008). To  
91 identify evidence of regulatory variation that might underlie adaptation to these conditions, an F<sub>1</sub> was  
92 generated between PT and the midwest-adapted maize reference line B73, and the leaf transcriptome  
93 analyzed under benign greenhouse conditions to detect ASE. Results of the analysis were compared  
94 with a published study in which B73 seedlings were exposed to cold, heat, salt and UV stress  
95 treatments (Makarevitch et al., 2015). A total of 277 genes were identified showing a pattern of ASE  
96 under benign conditions that mirrored the response of the same gene under stress in B73, hereafter  
97 referred to as constitutively stress responsive (CR). The CR candidate set included transcription factors  
98 and genes associated with plant hormone signalling, a number of which are discussed in more detail  
99 and presented as candidates for future functional analysis.

## 101 **MATERIALS AND METHODS**

### 102 **Plant material, RNA preparation, and sequencing**

103 Seed of the Mexican highland landrace Palomero Toluqueño accession Mexi5 was obtained from the  
104 International Maize and Wheat Improvement Center (CIMMYT; stock GID 244857). The original  
105 collection was made near to the city of Toluca, in Mexico state (19.286184 N, -99.570871 W), at an  
106 elevation of 2597 masl. An F<sub>1</sub> hybrid stock was generated from the cross between the inbred line B73  
107 and PT grown under greenhouse conditions and total RNA was extracted from a single, 14 days-old  
108 seedling using the Qiagen RNeasy Plant Mini Kit (cat ID 74904) according to the manufacturer's  
109 protocol. RNA integrity was assessed by spectrophotometry and agarose gel electrophoresis. Library  
110 preparation was performed using the Illumina protocol as outlined in the TruSeq RNA Sample  
111 Preparation Guide (15008136 A, November 2010) and paired-end sequencing was carried out on the  
112 Illumina HiSeq 2000 platform. Raw data is available in the NCBI ([www.ncbi.nlm.nih.gov](http://www.ncbi.nlm.nih.gov)) Sequence  
113 Read Archive under accession SRP011579.

114

### 115 **Allele Specific Expression (ASE) analysis**

116 Allele specific expression (ASE) analysis was based on the method of Lemmon and collaborators  
117 (Lemmon et al., 2014) and the detailed pipeline is presented as [Supplementary Data 1 \[pipeline\]](#). A set  
118 of 39475 B73 transcripts was generated by selecting the longest predicted transcript for each gene  
119 annotated in the AGPv3.22 B73 reference genome (<ftp://ftp.ensemblgenomes.org/pub/release-22/>). Six  
120 transcripts whose sequences consisted of only, or mostly, undefined (N) bases were removed  
121 (GRMZM2G031216\_T01, GRMZM2G179334\_T01, GRMZM2G307432\_T01,  
122 GRMZM2G316264\_T01, GRMZM2G406088\_T01 and GRMZM2G700875\_T01), resulting in a set of  
123 39469 sequences. A total of 151,168,196 paired-end reads from the B73xPT F<sub>1</sub> transcriptome were  
124 trimmed using Trimmomatic (Bolger, Lohse & Usadel, 2014) and aligned using bwa mem (Li, 2013) to

125 the set of B73 transcripts. The resulting alignment was processed using samtools, bcftools and vcfutils  
126 (Li et al., 2009); (Li, 2011a); (Li, 2011a,b) to identify polymorphisms. We then created a set of PT  
127 pseudo-transcripts by substituting the identified sequence variants into the B73 reference transcripts. A  
128 single fasta file was created that contained two sequences per locus, one B73 transcript and one PT  
129 pseudo-transcript, and B73xPT F<sub>1</sub> reads were re-aligned to this F<sub>1</sub> pseudo-reference using bowtie2  
130 (Langmead & Salzberg, 2012) with eXpress (Roberts et al., 2011); (Roberts & Pachter, 2013)  
131 recommended parameters. The number of reads per B73 and/or PT transcript was then quantified using  
132 eXpress. A total of 9256 transcripts were identified to contain polymorphisms, allowing estimation of  
133 ASE. Genes were considered to show ASE when the number of associated reads assigned to B73 or PT  
134 transcripts was significantly different ( $\chi^2$  test against an equal number of counts;  $p < 0.05$ ; Bonferroni  
135 correction for multiple tests) and the absolute log<sub>2</sub>-transformed ratio of PT/B73 reads was  $> 1$ .

136

### 137 **Gene Ontology annotation, enrichment analyses and comparison of ASE genes to published data**

138 Candidate ASE genes were assigned to Gene Ontology categories (release 52 available at  
139 <ftp://ftp.gramene.org/pub/gramene>). Obsolete annotations were replaced by the corresponding  
140 “consider” or “replaced\_by” category(ies) in the ontology file (go.obo) available at  
141 <http://www.geneontology.org/> (dated 2016-09-19). Categories associated with at least 10 genes were  
142 considered in further analysis. Enrichment analyses were performed comparing ASE candidates against  
143 the 9256 polymorphic gene set, using the Bingo (Maere, Heymans & Kuiper, 2005) Cytoscape  
144 (Shannon et al., 2003) plugin, controlling for multiple tests using Benjamini and Hochberg False  
145 Discovery Rate at 1%.

146 Candidate ASE genes were cross-referenced to a published study describing transcriptional  
147 responses in maize seedlings exposed to cold, heat, salt and UV stresses (Makarevitch et al., 2015).  
148 Although a number of inbred lines were analyzed in the Makarevitch study, only the B73 data was used



149 in the comparison with the B73xPT transcriptome. Genes were considered to show a constitutive stress  
150 response (CR) with respect to a given stress when: 1) identified as ASE; 2) responding significantly to  
151 stress in the Makarevitch study (absolute  $\log_2$  fold change  $>1$ ; called as significant in the Makarevitch  
152 study; calls “up” or “on” in the published study were considered here as “up”, similarly, “down” or  
153 “off” were considered as “down”); 3) the sign of ASE was concordant with the sign of stress response.

154 Fst values for population level differentiation between Mesoamerican and South American  
155 highland and lowland maize populations (Takuno *et al.*, 2015) were obtained from  
156 [https://github.com/rossibarra/hilo\\_paper/tree/master/fst](https://github.com/rossibarra/hilo_paper/tree/master/fst); where multiple SNPs are associated with a  
157 single gene, the values reported correspond to the SNP showing the highest Fst in Mesoamerica.

158

### 159 **Reconstruction of a gene co-expression network**

160 Publicly available maize Affymetrix microarray data was downloaded from the ArrayExpress website  
161 (<http://www.ebi.ac.uk/arrayexpress/>; experiments E-GEOD-10023, E-GEOD-12770, E-GEOD-12892,  
162 E-GEOD-18846, E-GEOD-19785, E-GEOD-22479, E-GEOD-28479, E-GEOD-31188, E-GEOD-  
163 40052, E-GEOD-41956, E-GEOD-48406, E-GEOD-48536, E-GEOD-54310, E-GEOD-59533, E-  
164 GEOD-69659, E-MEXP-1222, E-MEXP-1464, E-MEXP-1465, E-MEXP-2364, E-MEXP-2366, E-  
165 MEXP-2367, E-MEXP-3992). Low quality CEL files identified using the arrayQualityMetrics  
166 (Kauffmann, Gentleman & Huber, 2009) R package were discarded. Using the sample data relationship  
167 file (sdrf) associated with each experiment, samples for B73 leaves were selected, resulting in a high  
168 quality, homogeneous dataset of 165 CEL files.

169 Probeset sequences for the maize Affymetrix microarray were aligned using seqmap (Jiang & Wong,  
170 2008) to the AGPv3.22 transcripts with no mismatches allowed, and probesets whose probe sequences  
171 did not align or aligned to transcripts corresponding to more than one locus were discarded. Probesets  
172 that were represented by less than 4 probe sequences were also discarded. This resulted in a list of

173 11299 probesets that unambiguously matched one locus. The list of 11299 probesets was used to create  
174 a custom chip definition file (CDF) using the ArrayInitiative python package  
175 (<http://wellerlab.uncc.edu/ArrayInitiative/>), and to filter the original Affymetrix Maize.probe\_tab file to  
176 create a custom probe\_tab file. The custom CDF and custom probe\_tab file were then used to create the  
177 corresponding cdf and probe\_tab R packages using the makecdfenv (Irizarry *et al.*, 2006) and  
178 AnnotationForge (Carlson and Pages, 2017) R packages, respectively. The microarray name in the 165  
179 CEL files was then modified to match the custom cdf and probe\_tab packages name, and these  
180 modified CEL files were normalized using gcrma (Wu and Gentry, 2017). The resulting normalized  
181 dataset was then used as input for the ARACNE algorithm (Margolin *et al.*, 2006a); (Margolin *et al.*,  
182 2006b), and inference was carried out for the 7 ASE and stress-responsive transcription factors (see  
183 Results) at DPI 0.1 as previously described (Chávez Montes *et al.*, 2014). Enrichment analysis of the  
184 1938 TF targets gene set was done as described above against the 11299 genes represented in the  
185 microarray.

186

## 187 **RESULTS**

### 188 **A total of 2386 genes exhibited allele specific expression in the B73xPT F<sub>1</sub> hybrid**

189 To identify regulatory variation associated with stress-related genes, high throughput sequencing was  
190 used to quantify transcript abundance in leaves harvested from an F<sub>1</sub> seedling generated from the cross  
191 between the Mexican highland landrace PT and the reference line B73. Alignment to the B73 reference  
192 gene models identified 9256 genes containing at least one sequence variant that could be used to  
193 distinguish the products of B73 and PT alleles. For 2386 (26%) of these 9256 polymorphic transcripts,  
194 the number of reads corresponding to the B73 allele differed significantly ( $p < 0.05$ ; Bonferroni  
195 correction for multiple tests) from the number of reads corresponding to the PT allele with an absolute  
196  $\log_2$  fold change  $>1$ , and these genes were considered to exhibit allele specific expression (ASE;

197 **Supplementary Data 2 [F1\_counts]**). For 1412 (59%) of the ASE candidate genes, accumulation of the  
198 PT transcript was lower than that of the B73 transcript ( $\log_2 \text{PT/B73} < -1$ ; hereafter, “PT-down”), while  
199 for the remaining 974 (41%) of the ASE candidates, the PT transcript was accumulated at higher levels  
200 ( $\log_2 \text{PT/B73} > 1$ ; hereafter, “PT-up”).

201 To obtain an overview of the ASE candidates, a Gene Ontology (GO) analysis was performed.  
202 The set of 2386 ASE candidates was not enriched for any specific GO categories with respect to the  
203 9256 polymorphic gene set, but, nonetheless, many individual genes belonged to biological processes  
204 categories related to stress responses, including responses to heat (GO: 0009408), cold (GO: 0009409)  
205 and salt (GO: 0009651) (**Fig. 1**). Overall, 52 biological process categories were represented by at least  
206 10 genes. Of these, 38 (73%) were PT-down (based on the median  $\log_2 \text{PT/B73}$  of the associated  
207 genes), and 11 (21%) were PT-up, and the remaining 3 categories had a median  $\log_2 \text{PT/B73}$  close to 0  
208 (**Supplementary Data 3 [ASE\_loci\_GO\_P]**). A similar pattern was observed for molecular function  
209 categories: 57 categories were associated with at least ten ASE genes, 42 PT-down, 12 PT-up and 3  
210 showing no trend (**Supplementary Data 4 [ASE\_loci\_GO\_F]**).

211

## 212 **A total of 277 genes showed constitutive stress responses**

213 To identify evidence of a constitutive stress response (CR) in PT, the ASE gene set was compared with  
214 a previous study reporting changes in the transcriptome of B73 seedlings exposed to cold, heat, salt or  
215 UV treatments (Makarevitch *et al.*, 2015). A total of 1407 stress responsive genes identified in the  
216 Makarevitch study were present also in the 9256 polymorphic gene set for which ASE had been  
217 evaluated (**Supplementary Data 2 [F1\_counts]**). Of these 1407 genes, 432 (31%) showed ASE, a slight  
218 enrichment compared with the 2386 (26%) ASE genes in the 9256 polymorphic gene set as a whole ( $\chi^2$   
219 = 15.7, d.f. =1,  $p < 0.001$ ). From this 432 gene set, a gene was considered to exhibit CR in PT if the  
220 sign of ASE was concordant with the sign of B73 stress response: *i.e.* PT-up and induced by stress in

221 B73, or PT-down and repressed by stress in B73. On this basis, a set of 277 CR candidates was  
222 identified (Fig. 2A-D; Supplementary Data 5 [Maka\_can\_annot]). The majority of these 277 genes  
223 respond to two or more stress treatments (Fig. 3A, C), but often in different directions such that most  
224 present stress-specific CR (Fig. 3B, C): 194 were identified as showing CR with respect to one  
225 treatment, 62 with respect to two, 17 with respect to three, and 4 with respect to all four (Fig. 3C). Of  
226 the 277 genes, 92 showed CR with respect to cold, 65 with respect to heat, 136 with respect to salt, and  
227 92 with respect to UV (Fig. 3B). The number of CR genes with respect to any given stress was  
228 proportional to the number of genes responding to that stress in the 1407 polymorphic gene set ( $\chi^2 =$   
229 4.4, d.f. = 3,  $p = 0.22$ ), and there was no indication of an enrichment for CR with respect to any one of  
230 the four treatments. In contrast to the complete ASE gene set, the majority of the 277 CR genes were  
231 PT-up (181 PT-up, 96 PT-down; Supplementary Data 5 [Maka\_can\_annot]), reflecting a bias also  
232 present in the 1407 gene set, although this general trend was not observed when the UV treatment was  
233 considered alone, where the majority of CR genes were PT-down (Fig. 2D).

234

### 235 **Hormone related genes and transcription factors showed constitutive stress responses in PT**

236 A primary aim of the analysis was the definition of a small number of candidate genes for future  
237 functional analysis. For this purpose, the CR candidate genes were cross-referenced with the classical  
238 maize gene list, a curated set of 4908 well-annotated genes, many linked with existing functional data  
239 ([www.maizgedb.org/gene\\_center/gene](http://www.maizgedb.org/gene_center/gene)). Of the 277 CR candidate genes, 48 were present in the  
240 classical gene list (Fig. 4; Supplementary Data 5 [Maka\_can\_annot]), including 9 genes associated with  
241 hormone homeostasis (Table 1) and 12 transcription factors (TFs; Table 2; (Jin et al., 2017)) that were  
242 considered of special interest. The 277 CR candidates were cross referenced with a published study of  
243 population level differentiation between Mesoamerican and South American highland and lowland  
244 maize (Takuno *et al.*, 2015). Twenty-two of the 277 CR candidates showed significant  $F_{st}$  ( $p < 0.01$ )

245 between highland and lowland Mesoamerican populations, including the hormone associated gene  
246 *Czog1* (GRMZM2G168474; [Supplementary Data 5 \[Maka\\_can\\_annot\]](#)). To gain insight into potential  
247 TF targets and their role in stress responses, a gene co-expression network for the CR TFs was  
248 generated using available maize Affymetrix microarray data and the ARACNE algorithm. Seven of the  
249 12 TFs were unambiguously identified in the maize Affymetrix microarray probeset, and were co-  
250 expressed with 1938 genes ([Supplementary Data 6 \[tfs\\_ASE\\_01\\_suppl\]](#)). Co-expressed genes represent  
251 potential targets of TF action, and, as such, may not themselves exhibit ASE. Indeed, of the 1938 genes  
252 associated with the 7 TFs, 1097 were present in the polymorphic gene set, but only 239 showed ASE. A  
253 total of 344 of the 1938 co-expressed genes (17%) were responsive to one or more stress treatments in  
254 the Makarevitch dataset ([Fig. 5](#)). A GO analysis detected enrichment in the 1938 gene co-expression set  
255 with respect to translation, photosynthesis and non-mevalonate isoprenoid pathway categories  
256 ([Supplementary Data 7 \[Bingo\\_aracne\]](#)).

257

## 258 **DISCUSSION**

259 From a starting set of 9256 polymorphic genes, we identified 2386 genes presenting allele specific  
260 expression (ASE) in seedling leaves of an F<sub>1</sub> B73xPT hybrid individual. Comparison of our ASE gene  
261 list with a published dataset reporting B73 stress responses (Makarevitch et al., 2015) identified a  
262 subset of 277 (out of 432) constitutive stress response (CR) candidate genes exhibiting a bias in  
263 transcript accumulation between PT and B73 alleles that mirrored the B73 response to one or more  
264 stress treatments. We did not observe an enrichment in GO term assignments in either our ASE gene set  
265 or our CR gene set. Nonetheless, given that ASE is assaying *cis*-acting variation, a small number of  
266 genes associated with a given GO term may have biological significance. The ASE gene set showed a  
267 bias towards lower expression of the PT allele, reflected in the observation that the median value of  
268 ASE for the majority of GO categories associated with ASE genes was also negative. Contrary to this

269 trend, the subset of 277 selected CR candidates showed a bias towards higher expression of the PT  
270 allele (181 of 277 presented higher expression of the PT allele), also reflected in the 1407 polymorphic  
271 genes that overlapped with the Makarevitch set.

272 The bulk of the CR gene set (206 of 277) responded to two or more stresses in the Makarevitch  
273 B73 data, although in the majority (194 of 277) of cases the CR itself was with respect to a single stress  
274 only (Fig. 3), indicating that in many cases the sign (up/down) of the response in B73 differed between  
275 stresses (Supplementary Data 5 [Maka\_can\_annot]). In total, of the 1407 polymorphic and stress-  
276 responsive genes in the working set, 511 genes induced in B73 under at least one stress treatment were  
277 repressed under at least one other (Supplementary Data 2 [F1\_counts]). By definition, a gene could not  
278 show CR with respect to both of two different stresses if the B73 responses were opposing. There was  
279 no evidence that genes showing opposing stress responses in B73 were less likely to show CR in PT --  
280 indeed, such genes were actually better represented in the 277 CR gene set (56%) than in the 1407  
281 polymorphic and stress-responsive gene set (36%). As such, many ASE events may appear  
282 contradictory with respect to any given stress, *i.e.* PT-up ASE in genes repressed by B73 under stress,  
283 or PT-down ASE in genes induced by B73, especially in the context of cold and UV treatments, against  
284 which PT is considered to be well adapted. The spatio-temporal dynamics of stress responses, however,  
285 are complex (*e.g.* (Secco et al., 2013), and the resolution of the present analysis, based on single time  
286 points and tissues, is limited. For example, the previously characterized salt associated HD-ZIP  
287 transcription factor *Hb54* (also named *ZmHdz10*, GRMZM2G041127; (Zhao et al., 2011); (Zhao et al.,  
288 2014) showed PT-up ASE, but was repressed by salt treatment in the Makarevitch dataset, and  
289 consequently not considered to show CR. In this case, however, an additional functional study reports  
290 *Hb54* to indeed be induced by salt treatment (Zhao et al., 2014), albeit at a different time point, and  
291 with a different treatment than that applied in the Makarevitch study (300mM NaCl for 20hrs in  
292 Makarevitch *et al.*; 200mM NaCl for 3-12hrs in Zhao *et al.*). The study of Zhao and colleagues reports

293 also that constitutive expression of *Hb54* in *Arabidopsis* and rice increases ABA sensitivity and  
294 tolerance to drought and salt stress. In light of these data, PT-up ASE of *Hb54* may indeed have  
295 biological relevance, reflected by the number and nature of associated co-expression candidates (Fig.  
296 5). In the absence of further characterization, it would be premature to discount the potential phenotypic  
297 impact, or adaptive value, of other examples where ASE in PT is opposed to the B73 stress response  
298 reported in the Makarevitch data.

299         Previous studies have highlighted the importance of *cis*-acting regulatory variation in driving  
300 diversity in plant stress responses (*e.g.* (Waters et al., 2017). The generation of novel physiological  
301 strategies to confront stress conditions may be most efficient when a change in the regulation of a  
302 single gene has multiple, coordinated downstream consequences. Mechanistically, two functional  
303 categories of clear interest are hormones, systemic regulators of physiology at the whole plant level,  
304 and transcription factors (TFs), with their capacity to impact multiple downstream targets through a  
305 regulatory cascade. The 277 CR gene list includes eight hormone-related genes (Table 1), including  
306 genes implicated in the metabolism of cytokinin (*Czog1*; (Martin et al., 2001), jasmonate (*ZmOpr7*;  
307 (Yan et al., 2012) and ethylene (*Acco31*; (Gallie & Young, 2004); (Avila et al., 2016). Additional CR  
308 candidates included *Ks2* (GRMZM2G093526; *ZmKSL5*), a gene related to the *ent*-kaurene synthase  
309 required for gibberellin biosynthesis, but more likely involved in the more specialized kauralexin A  
310 series biosynthesis pathway (Fu et al., 2016), and *Thi2* (GRMZM2G074097), encoding a thiamine  
311 thiazole synthase activity required for synthesis of the thiazole moiety during the production of thiamin  
312 (vitamin B<sub>1</sub>; (Woodward et al., 2010). With regard to the latter candidate, B vitamins, although not  
313 strictly plant hormones, can play an analogous role in whole plant physiology in the face of stress  
314 (Hanson et al., 2016). Thiamin application has been reported to alleviate the impact of abiotic stress in  
315 a number of crops, including maize (*e.g.* (Kaya et al., 2015), and thiamin synthesis has been proposed  
316 as a target for transgenic biofortification (*e.g.* (Dong, Stockwell & Goyer, 2015). Identification of PT-

317 up ASE associated with *Thi2* represents a compelling target for further analysis. Interestingly, both  
318 *Thi2* and the related gene *Thi1* (GRMZM2G018375) were also co-expressed with the PT-up ASE  
319 drought and salt associated HD-ZIP TF *Hb54* ((Zhao et al., 2014); Table 2; Fig. 5; [Supplementary Data](#)  
320 [6](#)). Interestingly, the CR candidates *Czog1* and *Ks2* were reported previously to show significant  
321 population level differentiation between highland and lowland mesoamerican maize populations ( $F_{st}$ ;  $p$   
322 = 0.004,  $p = 0.04$ , respectively; (Takuno et al., 2015), indicating that variation at these loci may indeed  
323 play a role in local adaptation.

324 In total, twelve TFs were present in the 277 CR candidate gene set (Table 1), including four  
325 NAC TFs. The NAC TFs are a plant-specific family implicated broadly in abiotic stress responses  
326 (Nakashima et al., 2012); (Puranik et al., 2012); (Nuruzzaman, Sharoni & Kikuchi, 2013); (Nakashima,  
327 Yamaguchi-Shinozaki & Shinozaki, 2014), previously proposed as a target for engineering multiple  
328 stress tolerance (Shao, Wang & Tang, 2015). The potential role of NAC TFs in a generalized stress  
329 response is reflected by the observation that the candidates *ZmNacTF5* (GRMZM2G162739),  
330 *ZmNacTF25* (also named *ZmNac111*, GRMZM2G127379; (Mao et al., 2015), *ZmNacTF61*  
331 (GRMZM2G003715) and *ZmNacTF70* (GRMZM2G312201) responded to 3, 3, 2 and 1 stress  
332 treatments, respectively (Table 2). The genes *ZmNacTF5* and *ZmNacTF25* showed PT-down ASE, and  
333 CR with respect to salt and cold, respectively, while the genes *ZmNacTF61* and *ZmNacTF70* showed  
334 PT-up ASE and CR with respect to cold and UV, respectively. In B73, insertion of a miniature  
335 inverted-repeat transposable element (MITE) in the *ZmNacTF25* promoter has been reported previously  
336 to be associated with reduced gene expression (relative to a number of tropical lines) and increased  
337 susceptibility to drought (Mao et al., 2015). The accumulation of *ZmNacTF25* transcripts in B73,  
338 however, is reduced under cold in the Makarevitch dataset, indicating a potential trade-off between  
339 temperate and tropical lines, and possible relevance of the PT-down ASE in the highland niche. The  
340 gene *ZmNacTF61* was notable for strong PT-up ASE ( $\log_2$  PT/B73 = 3.26 and 2.15), up-regulation



341 under both cold and UV stress, and association with a large number (116) of strongly cold- and UV-  
342 induced co-expression candidates, including the jasmonate biosynthetic genes *Opr7* and *Lox4* (Fig. 4;  
343 Fig. 5; [Supplementary Data 6](#)).

344 Candidate CR genes presented here were identified on the basis of ASE under benign  
345 conditions. Investigation of the degree to which ASE is maintained under stress conditions is required  
346 to determine whether expression of these candidates has indeed been canalized to a constitutively  
347 responsive state, or whether expression of the PT alleles remains plastic, albeit with an expression level  
348 different from B73. Nonetheless, the potential to identify relevant *cis*-regulatory variation through  
349 exploration of the transcriptome under benign conditions presents an attractive avenue to investigate  
350 stress response and local adaptation. A number of the candidates identified here suggest testable  
351 predictions regarding hormone accumulation and expression of candidate TF targets in the PT landrace.  
352 In a number of cases, ASE was observed in genes reported previously to show significant genetic  
353 differentiation between lowland and highland Mexican maize populations, offering further evidence of  
354 a link to adaptation to the highland niche ([Supplementary Data 5 \[Maka\\_can\\_annot\]](#)). A recent study in  
355 monkey flower (*Mimulus guttatus*) using ASE analysis to compare locally adapted coastal and inland  
356 accessions has found *cis*-regulatory effects to be the main driver for regulatory variation, providing a  
357 precedent for the approach proposed here (Gould, Chen & Lowry, 2017). Validation of specific  
358 candidate genes will require functional characterization, but it is anticipated that this will be greatly  
359 facilitated by continued development of resources for maize reverse genetics and the forthcoming  
360 availability of introgression lines derived from Mexican highland maize (Matt Hufford and Ruairidh  
361 Sawers, unpublished data).

362

## 363 CONCLUSIONS

364 Expression differences were observed between PT and B73 alleles under benign conditions that mirror  
365 the B73 response to cold, heat, salt and/or UV treatments. The observed patterns of expression indicate

366 the presence of *cis*-acting regulatory variation differentiating the PT landrace from the B73 reference  
367 inbred. Regulatory variants linked to classical genes associated with signaling and stress-responses  
368 potentially contribute to the adaptation of PT to the Mexican highland environment.

369

#### 370 **ACKNOWLEDGEMENTS**

371 We acknowledge Patrice Dubois for assistance in the generation of F<sub>1</sub> seed stock, and Patrick Schnable  
372 and Cheng Ting Yeh for generation of transcriptome data.

373

**Table 1. ASE and stress-responsive hormone-related genes.** List of genes involved in hormone biosynthesis, transport or catabolism present in the 277 CR gene set. ASE call indicates biased expression of the PT allele (1) or B73 allele (-1). Response to stress indicates the name of the stress for which the gene was called as differentially expressed in the Makarevitch dataset. Constitutive response indicates the stress condition for which the sign of the ASE call and the stress response coincide.

| Gene id       | Symbol        | Molecular function                                       | Hormone                    | ASE call | Response to stress   | Constitutive response |
|---------------|---------------|----------------------------------------------------------|----------------------------|----------|----------------------|-----------------------|
| GRMZM2G070563 | ---           | auxin efflux carrier                                     | auxin transport            | 1        | heat, salt, uv       | heat, salt            |
| GRMZM2G072632 | ---           | auxin efflux carrier                                     | auxin transport            | 1        | heat, salt, uv       | heat, salt            |
| GRMZM2G112598 | ---           | auxin efflux carrier                                     | auxin transport            | 1        | heat, salt, uv       | heat, salt            |
| GRMZM2G475148 | ---           | auxin efflux carrier                                     | auxin transport            | 1        | heat, salt           | heat, salt            |
| GRMZM2G072529 | <i>Acco31</i> | 1-aminocyclopropane-1-carboxylate oxidase                | ethylene biosynthesis      | 1        | cold, heat, salt, uv | cold, heat, salt, uv  |
| GRMZM2G020761 | --            | putative cytochrome P450 (castasterone C-26 hydroxylase) | brassinosteroid catabolism | -1       | cold, salt, uv       | cold, uv              |
| GRMZM2G148281 | <i>Opr7</i>   | 12-oxo-phytodienoic acid                                 | jasmonate biosynthesis     | -1       | salt, uv             | salt                  |

|               |              |                                           |                       |   |      |      |
|---------------|--------------|-------------------------------------------|-----------------------|---|------|------|
|               |              | reductase                                 |                       |   |      |      |
| GRMZM2G168474 | <i>Czogl</i> | <i>cis</i> -zeatin O-glucosyl transferase | cytokinin homeostasis | 1 | salt | salt |

**Table 2. ASE and stress-responsive TFs.** List of TFs present in the 277 CR gene set. PlantTFDB family indicates the TF family according to the PlantTFDB ([Jin et al. 2017](#)). ASE call indicates biased expression of the PT allele (1) or B73 allele (-1). Response to stress indicates the name of the stress for which the gene was called as differentially expressed in the Makarevitch dataset. Constitutive response indicates the stress condition for which the sign of the ASE call and the stress response coincide. In Affymetrix array indicates of the TF is represented in the maize Affymetrix microarray.

| Gene id       | Symbol              | PlantTFDB family | ASE call | Response to stress | Constitutive response | In Affymetrix array? |
|---------------|---------------------|------------------|----------|--------------------|-----------------------|----------------------|
| GRMZM2G159937 | <i>Bhlh57</i>       | bHLH             | 1        | cold, salt, uv     | cold, uv              | no                   |
| GRMZM2G148333 | <i>Ereb202</i>      | ERF              | 1        | uv                 | uv                    | yes                  |
| GRMZM2G010920 | <i>Glk18</i>        | G2-like          | -1       | heat, uv           | uv                    | no                   |
| GRMZM2G127537 | <i>Hb11</i>         | HD-ZIP           | 1        | salt, uv           | salt                  | yes                  |
| GRMZM2G041127 | <i>Hb54/ZmHdz10</i> | HD-ZIP           | 1        | cold, heat, salt   | cold                  | yes                  |
| GRMZM2G049695 | <i>Mybr24</i>       | MYB-related      | 1        | salt, uv           | salt, uv              | no                   |
| GRMZM2G121753 | <i>Mybr89</i>       | MYB-related      | -1       | cold, salt, uv     | uv                    | no                   |

|                   |                                    |      |    |                   |          |     |
|-------------------|------------------------------------|------|----|-------------------|----------|-----|
| GRMZM2G12737<br>9 | <i>NacTF25/ZmNAC11</i><br><i>1</i> | NAC  | -1 | cold, salt,<br>uv | cold     | no  |
| GRMZM2G16273<br>9 | <i>NacTF5</i>                      | NAC  | -1 | cold, salt,<br>uv | salt     | yes |
| GRMZM2G00371<br>5 | <i>NacTF61</i>                     | NAC  | 1  | cold, uv          | cold, uv | yes |
| GRMZM2G31220<br>1 | <i>NacTF70</i>                     | NAC  | 1  | uv                | uv       | yes |
| GRMZM2G07190<br>7 | <i>Wrky50</i>                      | WRKY | 1  | salt              | salt     | yes |

**Figure 1. ASE candidate genes are assigned to a range of biological process Gene Ontology categories.** Hierarchical tree of Gene Ontology biological process categories represented in ASE loci. Nodes represent categories, with the root GO:0008150 *biological process* as the uppermost node. Edges represent the parent-child (*i.e.* “is\_a”) relationship between categories. Node color indicates the median ASE ( $\log_2$  PT/B73) for the genes in the category, with light blue indicating negative values and dark red indicating positive values. Node size is proportional to the number of loci assigned to corresponding category. Some category names were abbreviated for clarity.  
[2 COLUMNS]

**Figure 2. ASE identifies constitutive stress response in PT with respect to B73.** ASE ( $\log_2$  PT/B73) in control F<sub>1</sub> leaves for the 1407 sequence variant, stress-responsive gene set against B73 stress response ( $\log_2$  stress/control) for A) cold, B) heat, C) salt and D) UV treatments as reported in the Makarevitch dataset. Numbers in each quadrant represent the count of genes called as significant in ASE and stress comparisons. In each plot, the quadrants represent (clockwise from upper left) genes up ASE / down stress, up ASE / up stress, down ASE / up stress, down ASE / down stress. Genes called as up ASE / up stress or down ASE / down stress are considered canalized and are shown as filled circles. Other genes are shown as points. Axes through the origin are shown as red dashed lines. A number of genes outside the axis range are not shown, but are considered in the gene count.  
[TWO COLUMNS]

**Figure 3. CR candidates may respond to multiple stresses in B73.** A) Number of genes from the 277 CR gene set that responded to cold, heat, salt, UV or a combination of stresses in the Makarevitch B73 study. B) Number of genes called as CR in PT with respect to each stress from the same 277 gene set. C) Counts with respect to number of stresses of genes in A and B. Numbers above bars give counts.  
[ONE COLUMN]

**Figure 4. Classical CR candidate genes.** Heatmap representation of ASE ( $\log_2$  PT/B73) and B73 response to cold, heat, salt and UV stress ( $\log_2$  stress/control) as reported in the Makarevitch dataset. Asterisks (\*) in the stress columns indicate a given gene was called as CR with respect to that stress.  
[ONE COLUMN]

**Figure 5. Co-expression networks for CR TFs and their putative stress-responsive targets.** Nodes represent genes and edges represent co-expression as calculated by the ARACNE algorithm at DPI 0.1. The center panel presents a network of seven CR TFs (labeled centres of circles) with their co-expressed, stress-responsive (genes called up/on or down/off in the Makarevitch dataset) putative targets. Triangles indicate genes that were called as presenting ASE. The network was filtered to retain only co-expressed genes responsive cold, salt, UV or heat treatments. In the filtered networks the red and blue colors indicate up or down regulation (as  $\log_2$  FC from the Makarevitch dataset), respectively, under the corresponding stress.  
[TWO COLUMNS]

## REFERENCES

- Avila LM., Cerrudo D., Swanton C., Lukens L. 2016. Brevis plant1, a putative inositol polyphosphate 5-phosphatase, is required for internode elongation in maize. *Journal of Experimental Botany* 67:1577–1588.
- Bolger AM., Lohse M., Usadel B. 2014. Trimmomatic: a flexible trimmer for Illumina sequence data. *Bioinformatics* 30:2114–2120.
- Carlson M., Pages H. 2017. AnnotationForge: Code for Building Annotation Database Packages. *R package version 1.18.0*.
- Chávez Montes RA., Coello G., González-Aguilera KL., Marsch-Martínez N., de Folter S., Alvarez-Buylla ER. 2014. ARACNe-based inference, using curated microarray data, of Arabidopsis thaliana root transcriptional regulatory networks. *BMC Plant Biology* 14:97.
- Des Marais DL., Hernandez KM., Juenger TE. 2013. Genotype-by-Environment Interaction and Plasticity: Exploring Genomic Responses of Plants to the Abiotic Environment. *Annual Review of Ecology, Evolution, and Systematics* 44:5–29.
- Dong W., Stockwell VO., Goyer A. 2015. Enhancement of Thiamin Content in Arabidopsis thaliana by Metabolic Engineering. *Plant & Cell Physiology* 56:2285–2296.
- Eagles HA., Lothrop JE. 1994. Highland Maize from Central Mexico? Its Origin, Characteristics, and Use in Breeding Programs. *Crop science* 34:11.
- Fu J., Ren F., Lu X., Mao H., Xu M., Degenhardt J., Peters RJ., Wang Q. 2016. A Tandem Array of ent-Kaurene Synthases in Maize with Roles in Gibberellin and More Specialized Metabolism. *Plant Physiology* 170:742–751.
- Furbank RT., Tester M. 2011. Phenomics--technologies to relieve the phenotyping bottleneck. *Trends*



in *Plant Science* 16:635–644.

Gallie DR., Young TE. 2004. The ethylene biosynthetic and perception machinery is differentially expressed during endosperm and embryo development in maize. *Molecular Genetics and Genomics* 271:267–281.

Gould BA., Chen Y., Lowry DB. 2017. The gene regulatory landscape of local adaptation. *bioRxiv doi: 10.1101/145805*.

Hannah MA., Wiese D., Freund S., Fiehn O., Heyer AG., Hinch DK. 2006. Natural genetic variation of freezing tolerance in Arabidopsis. *Plant Physiology* 142:98–112.

Hanson AD., Beaudoin GA., McCarty DR., Gregory JF. 2016. Does abiotic stress cause functional B vitamin deficiency in plants? *Plant Physiology* 172:2082–2097.

Hayano-Kanashiro C., Calderón-Vázquez C., Ibarra-Laclette E., Herrera-Estrella L., Simpson J. 2009. Analysis of gene expression and physiological responses in three Mexican maize landraces under drought stress and recovery irrigation. *Plos One* 4:e7531.

von Heckel K., Stephan W., Hutter S. 2016. Canalization of gene expression is a major signature of regulatory cold adaptation in temperate *Drosophila melanogaster*. *BMC Genomics* 17:574.

Hilker M., Schwachtje J., Baier M., Balazadeh S., Bäurle I., Geiselhardt S., Hinch DK., Kunze R., Mueller-Roeber B., Rillig MC. et al. 2016. Priming and memory of stress responses in organisms lacking a nervous system. *Biological Reviews of the Cambridge Philosophical Society* 91:1118–1133.

Houle D., Govindaraju DR., Omholt S. 2010. Phenomics: the next challenge. *Nature Reviews. Genetics* 11:855–866.

Jiang C., Edmeades GO., Armstead I., Lafitte HR., Hayward MD., Hoisington D. 1999. Genetic analysis of adaptation differences between highland and lowland tropical maize using molecular markers. *TAG Theoretical and Applied Genetics* 99:1106–1119.

- Jiang H., Wong WH. 2008. SeqMap: mapping massive amount of oligonucleotides to the genome. *Bioinformatics* 24:2395–2396.
- Jin J., Tian F., Yang D-C., Meng Y-Q., Kong L., Luo J., Gao G. 2017. PlantTFDB 4.0: toward a central hub for transcription factors and regulatory interactions in plants. *Nucleic Acids Research* 45:D1040–D1045.
- Kamthan A., Chaudhuri A., Kamthan M., Datta A. 2016. Genetically modified (GM) crops: milestones and new advances in crop improvement. *TAG. Theoretical and Applied Genetics. Theoretische und Angewandte Genetik* 129:1639–1655.
- Kauffmann A., Gentleman R., Huber W. 2009. arrayQualityMetrics--a bioconductor package for quality assessment of microarray data. *Bioinformatics* 25:415–416.
- Kaya C., Ashraf M., Sonmez O., Tuna AL., Polat T., Aydemir S. 2015. Exogenous application of thiamin promotes growth and antioxidative defense system at initial phases of development in salt-stressed plants of two maize cultivars differing in salinity tolerance. *Acta physiologiae plantarum / Polish Academy of Sciences, Committee of Plant Physiology Genetics and Breeding* 37.
- Lafitte HR., Edmeades GO. 1997. Temperature effects on radiation use and biomass partitioning in diverse tropical maize cultivars. *Field crops research* 49:231–247.
- Langmead B., Salzberg SL. 2012. Fast gapped-read alignment with Bowtie 2. *Nature Methods* 9:357–359.
- Lasky JR., Des Marais DL., Lowry DB., Povolotskaya I., McKay JK., Richards JH., Keitt TH., Juenger TE. 2014. Natural variation in abiotic stress responsive gene expression and local adaptation to climate in *Arabidopsis thaliana*. *Molecular Biology and Evolution* 31:2283–2296.
- Lemmon ZH., Bukowski R., Sun Q., Doebley JF. 2014. The role of cis regulatory evolution in maize domestication. *PLoS Genetics* 10:e1004745.
- Levins R. *Evolution in changing environments*. Princeton, N.J. □: Princeton University Press, 1968.:

Princeton University Press.

Li H. 2011a. Improving SNP discovery by base alignment quality. *Bioinformatics* 27:1157–1158.

Li H. 2011b. A statistical framework for SNP calling, mutation discovery, association mapping and population genetical parameter estimation from sequencing data. *Bioinformatics* 27:2987–2993.

Li H. 2013. Aligning sequence reads, clone sequences and assembly contigs with BWA-MEM. *arXiv:1303.3997*.

Li H., Handsaker B., Wysoker A., Fennell T., Ruan J., Homer N., Marth G., Abecasis G., Durbin R., 1000 Genome Project Data Processing Subgroup. 2009. The Sequence Alignment/Map format and SAMtools. *Bioinformatics* 25:2078–2079.

Maere S., Heymans K., Kuiper M. 2005. BiNGO: a Cytoscape plugin to assess overrepresentation of gene ontology categories in biological networks. *Bioinformatics* 21:3448–3449.

Makarevitch I., Waters AJ., West PT., Stitzer M., Hirsch CN., Ross-Ibarra J., Springer NM. 2015. Transposable elements contribute to activation of maize genes in response to abiotic stress. *PLoS Genetics* 11:e1004915.

Mao H., Wang H., Liu S., Li Z., Yang X., Yan J., Li J., Tran L-SP., Qin F. 2015. A transposable element in a NAC gene is associated with drought tolerance in maize seedlings. *Nature Communications* 6:8326.

Margolin AA., Nemenman I., Basso K., Wiggins C., Stolovitzky G., Dalla Favera R., Califano A. 2006a. ARACNE: an algorithm for the reconstruction of gene regulatory networks in a mammalian cellular context. *BMC Bioinformatics* 7 Suppl 1:S7.

Margolin AA., Wang K., Lim WK., Kustagi M., Nemenman I., Califano A. 2006b. Reverse engineering cellular networks. *Nature Protocols* 1:662–671.

Martin RC., Mok MC., Habben JE., Mok DW. 2001. A maize cytokinin gene encoding an O-glucosyltransferase specific to cis-zeatin. *Proceedings of the National Academy of Sciences of the*

*United States of America* 98:5922–5926.

- Mercer K., Martínez-Vásquez Á., Perales HR. 2008. Asymmetrical local adaptation of maize landraces along an altitudinal gradient. *Evolutionary applications* 1:489–500.
- Nakashima K., Takasaki H., Mizoi J., Shinozaki K., Yamaguchi-Shinozaki K. 2012. NAC transcription factors in plant abiotic stress responses. *Biochimica et Biophysica Acta* 1819:97–103.
- Nakashima K., Yamaguchi-Shinozaki K., Shinozaki K. 2014. The transcriptional regulatory network in the drought response and its crosstalk in abiotic stress responses including drought, cold, and heat. *Frontiers in plant science* 5:170.
- Nuruzzaman M., Sharoni AM., Kikuchi S. 2013. Roles of NAC transcription factors in the regulation of biotic and abiotic stress responses in plants. *Frontiers in microbiology* 4:248.
- Perales H., Golicher D. 2014. Mapping the diversity of maize races in Mexico. *Plos One* 9:e114657.
- Prasanna BM. 2012. Diversity in global maize germplasm: characterization and utilization. *Journal of Biosciences* 37:843–855.
- Puranik S., Sahu PP., Srivastava PS., Prasad M. 2012. NAC proteins: regulation and role in stress tolerance. *Trends in Plant Science* 17:369–381.
- Rengel D., Arribat S., Maury P., Martin-Magniette M-L., Hourlier T., Laporte M., Varès D., Carrère S., Grieu P., Balzergue S. et al. 2012. A gene-phenotype network based on genetic variability for drought responses reveals key physiological processes in controlled and natural environments. *Plos One* 7:e45249.
- Roberts A., Pachter L. 2013. Streaming fragment assignment for real-time analysis of sequencing experiments. *Nature Methods* 10:71–73.
- Roberts A., Trapnell C., Donaghey J., Rinn JL., Pachter L. 2011. Improving RNA-Seq expression estimates by correcting for fragment bias. *Genome Biology* 12:R22.
- Romero Navarro JA., Willcox M., Burgueño J., Romay C., Swarts K., Trachsel S., Preciado E., Terron

- A., Delgado HV., Vidal V. et al. 2017. A study of allelic diversity underlying flowering-time adaptation in maize landraces. *Nature Genetics* 49:476–480.
- Ruiz Corral JA., Durán Puga N., Sánchez González J de J., Ron Parra J., González Eguiarte DR., Holland JB., Medina García G. 2008. Climatic adaptation and ecological descriptors of 42 mexican maize races. *Crop science* 48:1502.
- Secco D., Jabnourne M., Walker H., Shou H., Wu P., Poirier Y., Whelan J. 2013. Spatio-temporal transcript profiling of rice roots and shoots in response to phosphate starvation and recovery. *The Plant Cell* 25:4285–4304.
- Shannon P., Markiel A., Ozier O., Baliga NS., Wang JT., Ramage D., Amin N., Schwikowski B., Ideker T. 2003. Cytoscape: a software environment for integrated models of biomolecular interaction networks. *Genome Research* 13:2498–2504.
- Shao H., Wang H., Tang X. 2015. NAC transcription factors in plant multiple abiotic stress responses: progress and prospects. *Frontiers in plant science* 6:902.
- Sood S., Flint-Garcia S., Willcox MC., Holland JB. 2014. Mining Natural Variation for Maize Improvement: Selection on Phenotypes and Genes. In: Tuberosa R, Graner A, Frison E eds. *Genomics of Plant Genetic Resources*. Dordrecht: Springer Netherlands, 615–649.
- Springer NM., Stupar RM. 2007a. Allelic variation and heterosis in maize: how do two halves make more than a whole? *Genome Research* 17:264–275.
- Springer NM., Stupar RM. 2007b. Allele-specific expression patterns reveal biases and embryo-specific parent-of-origin effects in hybrid maize. *The Plant Cell* 19:2391–2402.
- Swanson-Wagner R., Briskine R., Schaefer R., Hufford MB., Ross-Ibarra J., Myers CL., Tiffin P., Springer NM. 2012. Reshaping of the maize transcriptome by domestication. *Proceedings of the National Academy of Sciences of the United States of America* 109:11878–11883.
- Takuno S., Ralph P., Swarts K., Elshire RJ., Glaubitz JC., Buckler ES., Hufford MB., Ross-Ibarra J.

2015. Independent molecular basis of convergent highland adaptation in maize. *Genetics* 200:1297–1312.

Waddington CH. 1942. Canalization of Development and the Inheritance of Acquired Characters. *Nature* 150:563–565.

Waters AJ., Makarevitch I., Noshay J., Burghardt LT., Hirsch CN., Hirsch CD., Springer NM. 2017. Natural variation for gene expression responses to abiotic stress in maize. *The Plant Journal: for Cell and Molecular Biology* 89:706–717.

Woodward JB., Abeydeera ND., Paul D., Phillips K., Rapala-Kozik M., Freeling M., Begley TP., Ealick SE., McSteen P., Scanlon MJ. 2010. A maize thiamine auxotroph is defective in shoot meristem maintenance. *The Plant Cell* 22:3305–3317.

Wu J., Gentry RI. 2017. gcrma: Background Adjustment Using Sequence Information. *R package version 2.48.0*.

Yan Y., Christensen S., Isakeit T., Engelberth J., Meeley R., Hayward A., Emery RJN., Kolomiets MV. 2012. Disruption of OPR7 and OPR8 reveals the versatile functions of jasmonic acid in maize development and defense. *The Plant Cell* 24:1420–1436.

Zhang X., Borevitz JO. 2009. Global analysis of allele-specific expression in *Arabidopsis thaliana*. *Genetics* 182:943–954.

Zhao Y., Ma Q., Jin X., Peng X., Liu J., Deng L., Yan H., Sheng L., Jiang H., Cheng B. 2014. A novel maize homeodomain-leucine zipper (HD-Zip) I gene, Zmhdz10, positively regulates drought and salt tolerance in both rice and *Arabidopsis*. *Plant & Cell Physiology* 55:1142–1156.

Zhao Y., Zhou Y., Jiang H., Li X., Gan D., Peng X., Zhu S., Cheng B. 2011. Systematic analysis of sequences and expression patterns of drought-responsive members of the HD-Zip gene family in maize. *Plos One* 6:e28488.

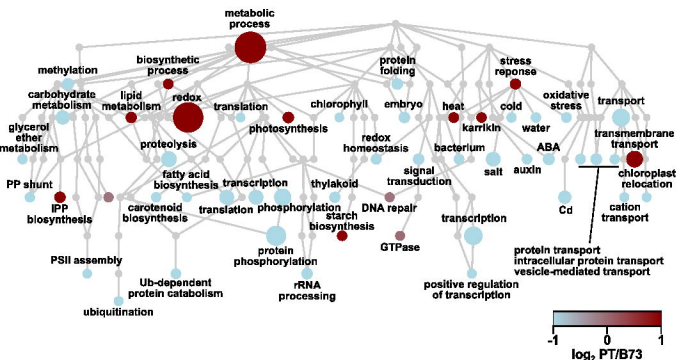

**A**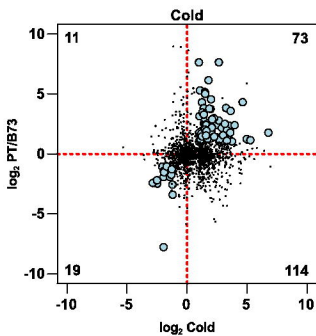**B**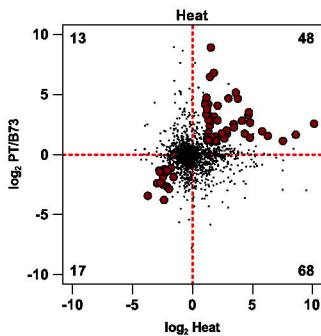**C**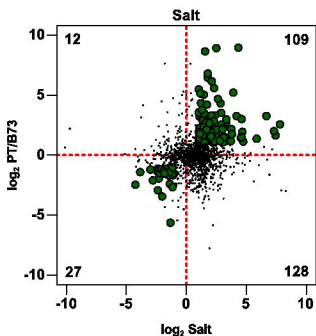**D**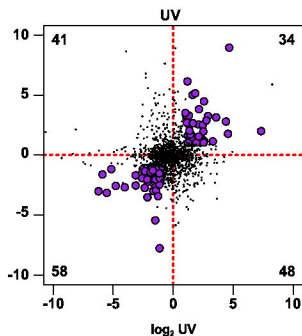



**A**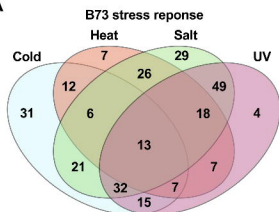**B**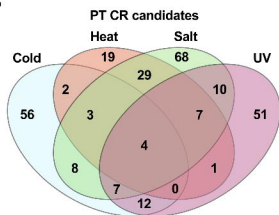**C**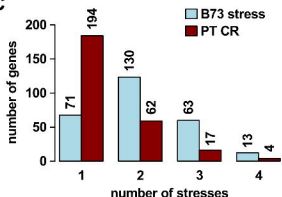

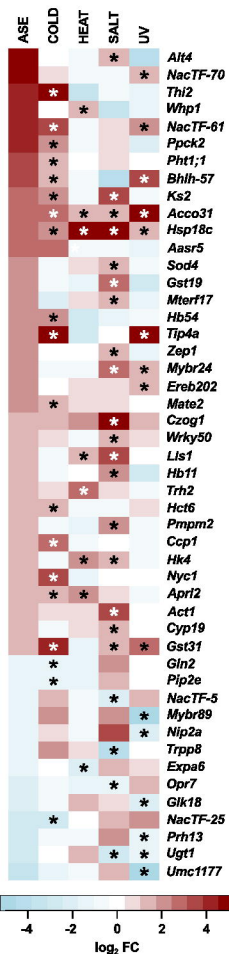

COLD

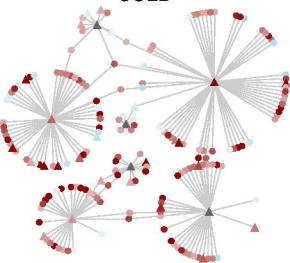

HEAT

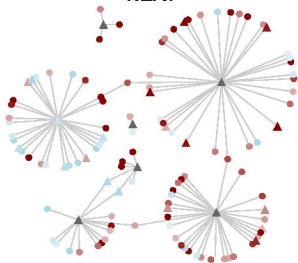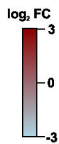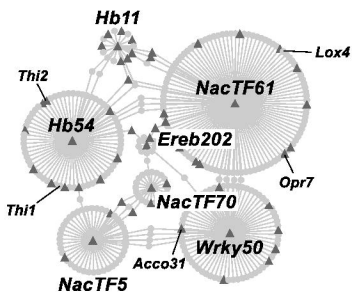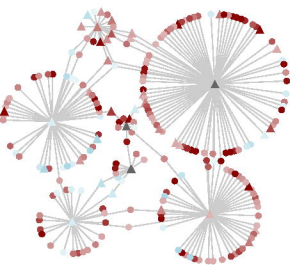

SALT

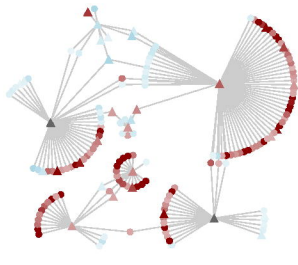

UV
